# Supplementary material
Source: MDPI journal article supplement (https://www.mdpi.com/1660-4601/11/8/8529)
Supplement: s1 [file s1]

## **Correction of Acknowledgments**

In the original published version of this paper we did not correctly and fully acknowledge our financial support. The acknowledgment is hereby additionally published as follows.

The authors would like to thank all health professionals from local and regional health authorities for collaborating, and in particular the members of the Working Group of the to syndromic surveillance system among migrant populations: Luigi Rubens Curia, Lorenzo Antonio Surace, Antonio Zaccone, Renato Pizzuti, Alba Carola Finarelli, Maria Grazia Pascucci, Roberto Carloni, Gabriella Paoli, Sergio Schiaffino, Liliana Coppola, Maria Gramegna, Mario Verrecchia, Bernhard Natter, Cinzia Germinario, Rosa Prato, Donatella Campus, Rita Masala, Bruno Massidda, Anna Maria Vecchi, Mario Palermo, Emanuela Balocchini, Lucia Pecori, Maria Donata Giaimo, Anna Tosti, Francesca Russo. The project was implemented with a financial support of the Italian Ministry of Health – CCM.
